# Supplementary material for: Absolute quantification of translational regulation and burden using combined sequencing approaches
Source: PubMed Central journal article supplement (PMC6498945; doi:10.15252/msb.20188719), 2019-05-03
Supplement: MSB-15-e8719-s001.pdf [file MSB-15-e8719-s001.pdf]

Appendix for:

## **Absolute quantification of translational regulation and burden using combined sequencing approaches**

Thomas E. Goroehowski, Irina Chelysheva, Mette Eriksen, Priyanka Nair, Steen Pedersen, Zoya Ignatova

| <b>Supplementary Figures</b>                                                                                        | <b>Page</b> |
|---------------------------------------------------------------------------------------------------------------------|-------------|
| Figure S1: Expression of the RNA spike-in standards in the RNA-Seq libraries                                        | 2           |
| Figure S2: Sequencing data exhibit a good correlation between biological replicates                                 | 3           |
| Figure S3: Comparison of ribosome protected fragments (RPFs) mapping to first and second half of each coding region | 4           |
| Figure S4: Normalized ribosome P site occupancies across the genome                                                 | 5           |
| Figure S5: Distributions of mRNA copy numbers and normalized RPF reads                                              | 6           |
| Figure S6: Estimating ribosome P site position from an RPF read                                                     | 7           |
| <b>Supplementary Tables</b>                                                                                         |             |
| Table S1: Measurements of cellular parameters                                                                       | 8           |
| Table S2: Sequencing and read mapping statistics                                                                    | 9           |

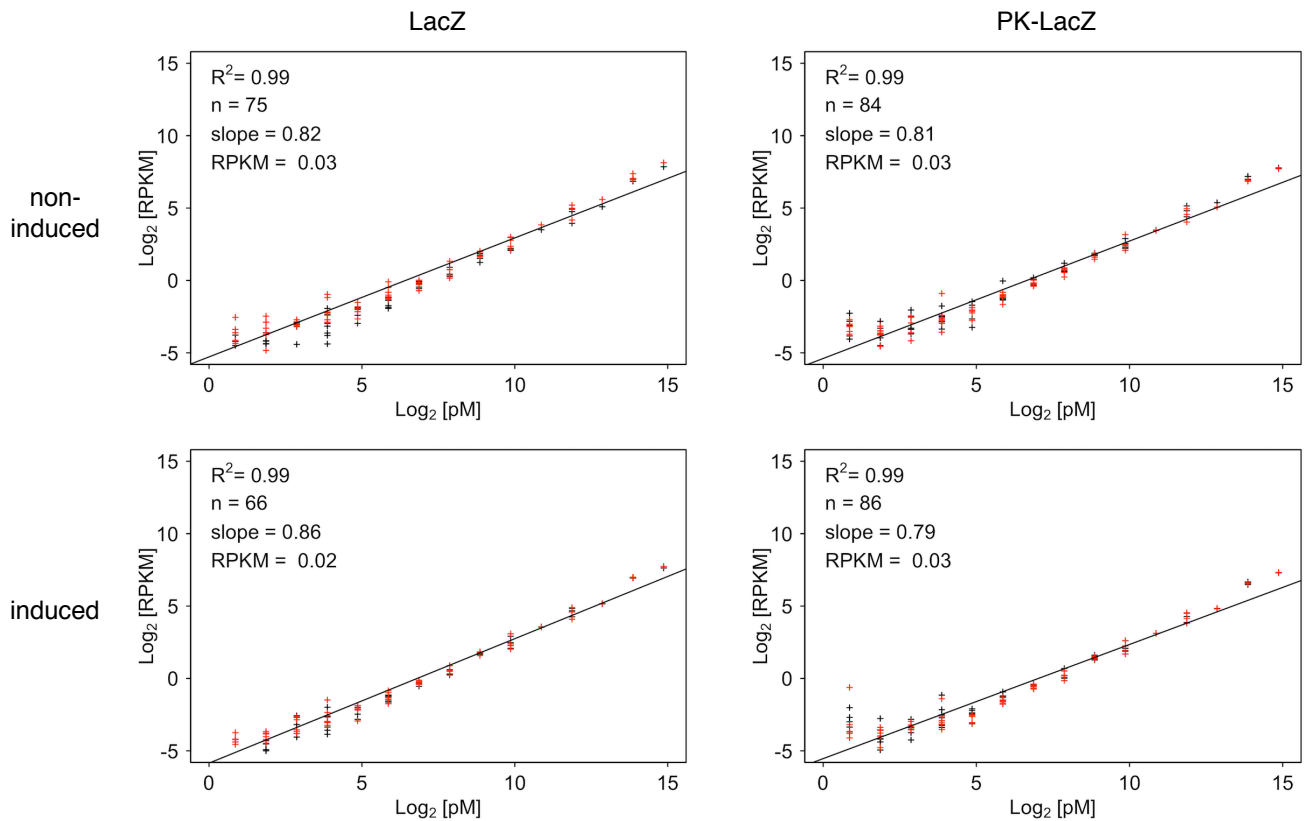

**Figure S1: Expression of the RNA spike-in standards in the RNA-Seq libraries.** Each point represents a single RNA from the spike-in mixture. Both biological replicates are shown in red and black, respectively. Expression of each spike-in RNA is given in Reads Per Kilobase of transcript per Million mapped reads (RPKM) units. This RPKM value in the inset sets the detection threshold in each RNA-Seq set (**Materials and Methods**). ‘n’ denotes the number of RNA standards with linear dependence of their concentration in the spike-in mixture (slope); those standards were further considered for copy number determination.  $R^2$ , Pearson correlation coefficient.

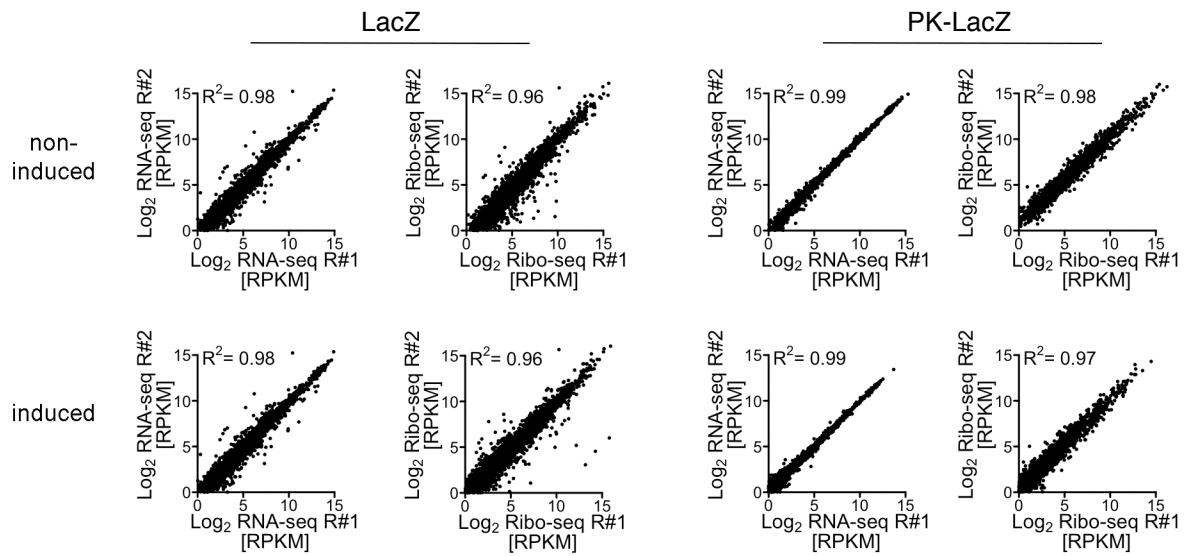

**Figure S2: Sequencing data exhibit a good correlation between biological replicates.** Correlation of the RNA-seq and Ribo-seq data of two biological replicates from induced and non-induced cells expressing either LacZ or LacZ-PK. Expression of each gene for both RNA-seq and Ribo-seq data sets given in Reads Per Kilobase of transcript per Million mapped reads (RPKM) units.  $R^2$ , Pearson correlation coefficient.

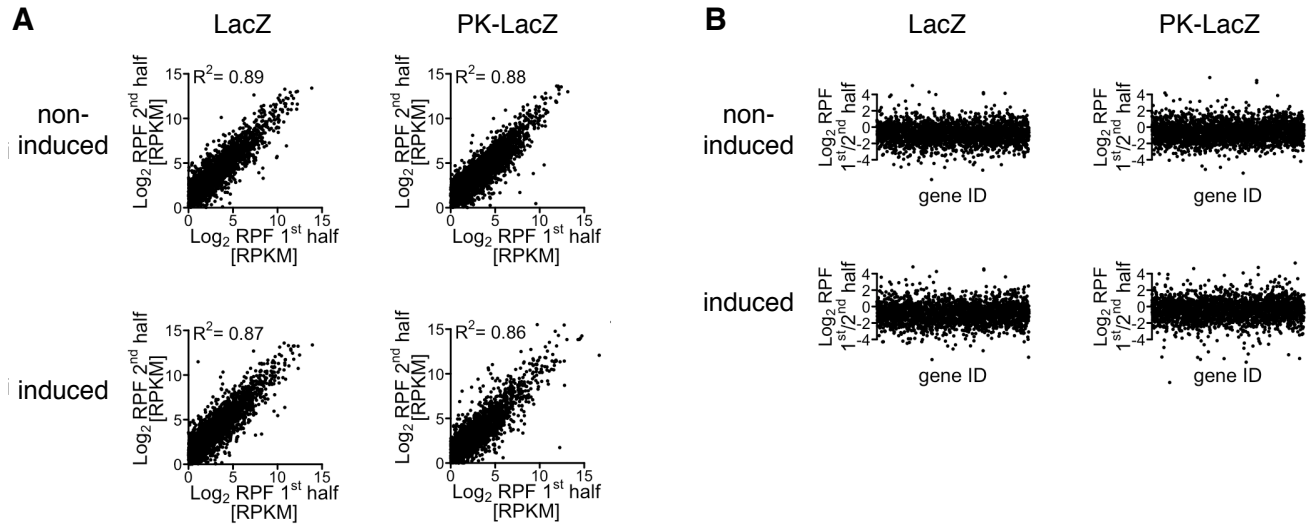

**Figure S3: Comparison of ribosome protected fragments (RPFs) mapping to first and second half of each coding region. (A)** Each point represents a coding region with expression given in Reads Per Kilobase of transcript per Million mapped reads (RPKM) units. **(B)** Log<sub>2</sub> fold-change in RPF counts between 1<sup>st</sup> and 2<sup>nd</sup> half of each coding region. Genes ordered alphabetically by name (gene ID). First 51 bp and last 9 bp of each coding region not included in the calculation. R<sup>2</sup>, Pearson correlation coefficient.

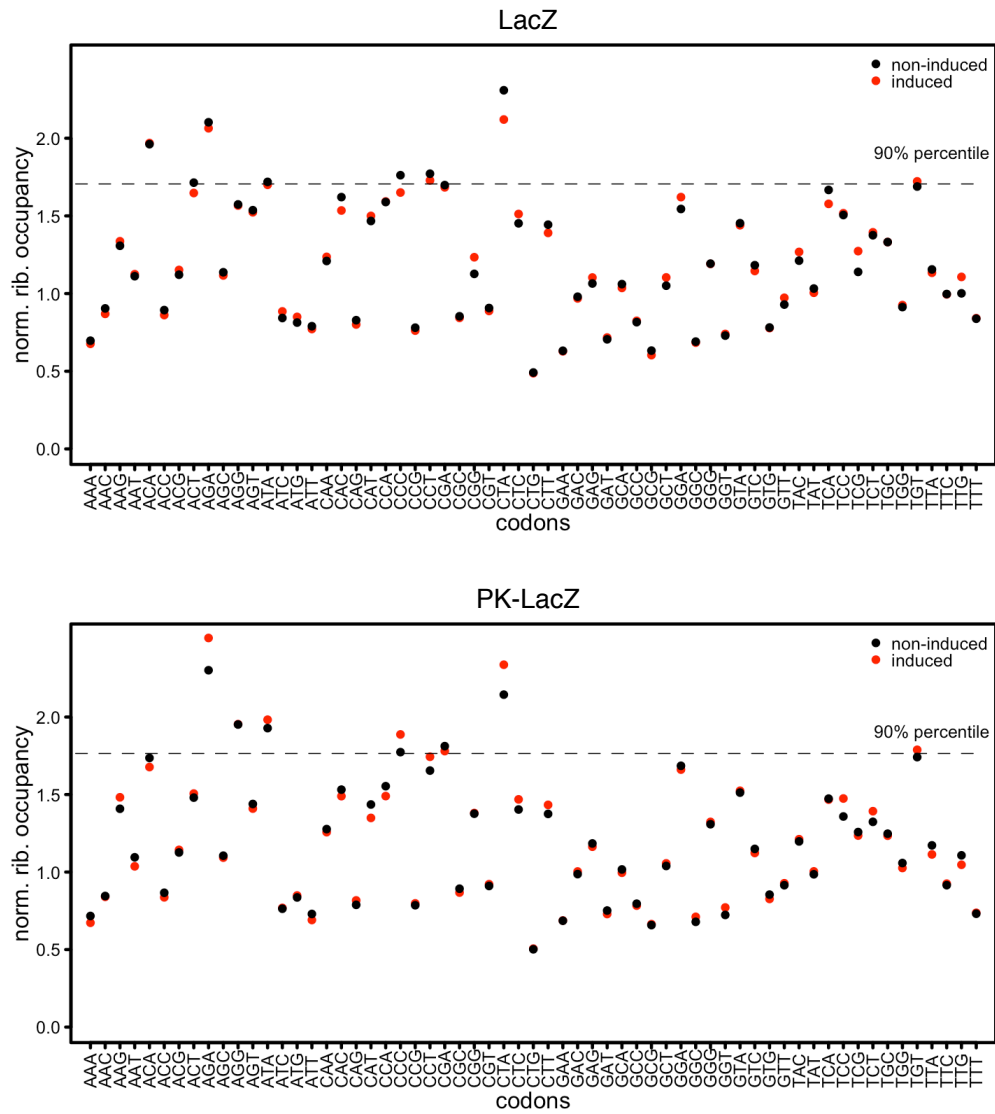

**Figure S4: Normalized ribosome P site occupancies across the transcriptome.** Values given for each codon for cells harboring LacZ or LacZ-PK variants in non-induced (black) and induced (red) conditions.

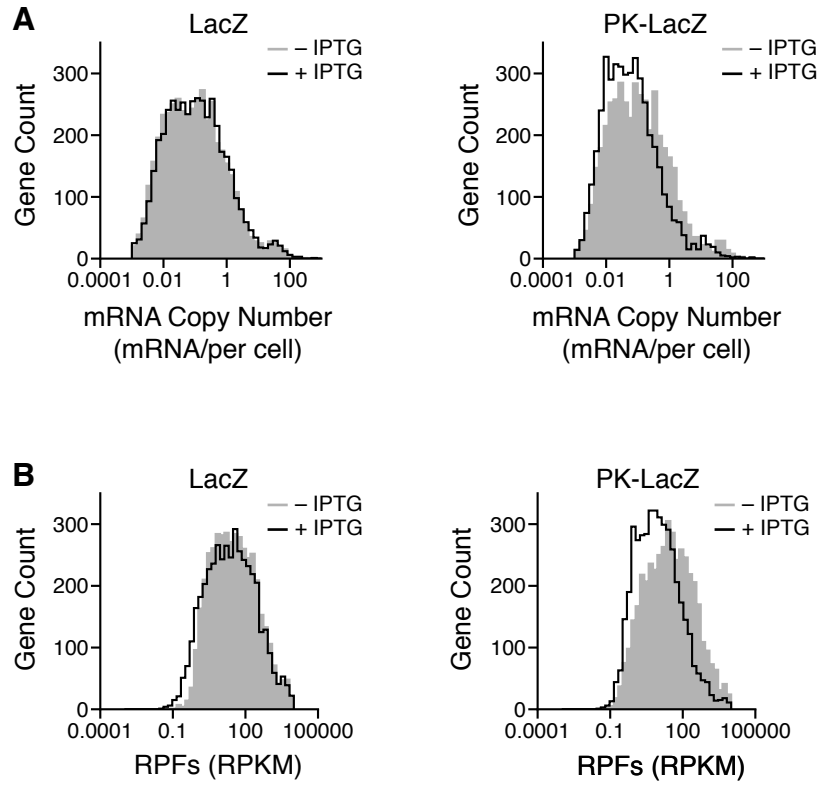

**Figure S5: Distributions of mRNA copy numbers and normalized RPF reads.** Data shown for cells harboring the LacZ and PK-LacZ variants before and after induction with IPTG (1 mM).

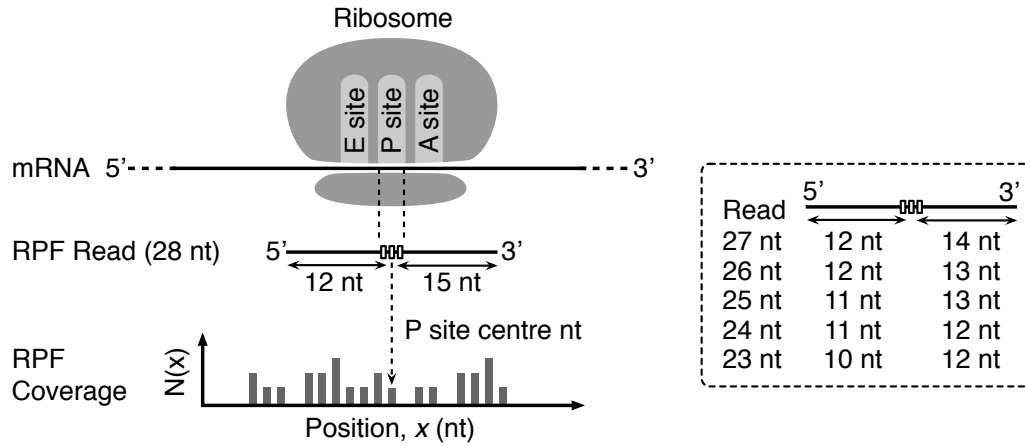

**Figure S6: Estimating ribosome P site position from an RPF read.** Box shows different lengths used from 5' and 3'-end of various RPF read lengths to calculate position of central nucleotide in the ribosome P site codon.

**Table S1: Measurements of cellular parameters**

| Measurement                           | Start of induction     |                        | End of induction <sup>a</sup> |                        |
|---------------------------------------|------------------------|------------------------|-------------------------------|------------------------|
|                                       | LacZ                   | PK-LacZ                | LacZ                          | PK-LacZ                |
| Doubling time (minutes)               | 85                     | 85                     | – <sup>b</sup>                | – <sup>b</sup>         |
| Cell count                            | $1.6 \times 10^9$      | $1.6 \times 10^9$      | $1.6 \times 10^9$             | $1.6 \times 10^9$      |
| Protein mass (grams/cell)             | $4.13 \times 10^{-13}$ | $4.10 \times 10^{-13}$ | $4.70 \times 10^{-13}$        | $4.30 \times 10^{-13}$ |
| Mass of LacZ/PK-LacZ as total of cell | –                      | –                      | 14%                           | 5.8%                   |

a. Induction of constructs lasted 10 min for LacZ and 15 min for PK-LacZ before samples were taken.

b. No measurable growth detected during the induction period.



**Table S2: Sequencing and read mapping statistics**

| Sample <sup>a</sup> |          |             |     | Total # of reads <sup>b</sup> | Multi-mapped reads <sup>c</sup> | Non-coding <sup>c</sup> | Uniquely mapped to mRNA <sup>c</sup> |
|---------------------|----------|-------------|-----|-------------------------------|---------------------------------|-------------------------|--------------------------------------|
| PK-LacZ             | RNA-seq  | non-induced | R#1 | 66066771                      | 29796556<br>(45.10%)            | 2876188<br>(4.35%)      | 33394027<br>(50.55%)                 |
| PK-LacZ             | RNA-seq  | non-induced | R#2 | 39198111                      | 18025740<br>(45.99%)            | 1673252<br>(4.27%)      | 19499119<br>(49.75%)                 |
| PK-LacZ             | RNA-seq  | induced     | R#1 | 70004102                      | 28545341<br>(40.78%)            | 1982506<br>(2.83%)      | 39476255<br>(56.39%)                 |
| PK-LacZ             | RNA-seq  | induced     | R#2 | 68146152                      | 27782049<br>(40.77%)            | 1931069<br>(2.83%)      | 38433034<br>(56.40%)                 |
| PK-LacZ             | Ribo-seq | non-induced | R#1 | 59384989                      | 25736660<br>(43.34%)            | 3034480<br>(5.11%)      | 30613849<br>(51.55%)                 |
| PK-LacZ             | Ribo-seq | non-induced | R#2 | 62798001                      | 23567687<br>(37.53%)            | 6009235<br>(9.57%)      | 33221079<br>(52.90%)                 |
| PK-LacZ             | Ribo-seq | induced     | R#1 | 56568122                      | 27566889<br>(48.73%)            | 2387216<br>(4.22%)      | 26614017<br>(47.05%)                 |
| PK-LacZ             | Ribo-seq | induced     | R#2 | 54581989                      | 20143633<br>(36.91%)            | 3541469<br>(6.49%)      | 30896887<br>(56.61%)                 |
| LacZ                | RNA-seq  | non-induced | R#1 | 192586734                     | 90755510<br>(47.12%)            | 7758247<br>(4.03%)      | 94072977<br>(48.85%)                 |
| LacZ                | RNA-seq  | non-induced | R#2 | 53735584                      | 28463851<br>(52.97%)            | 3382171<br>(6.29%)      | 21889562<br>(40.74%)                 |
| LacZ                | RNA-seq  | induced     | R#1 | 190867334                     | 91396079<br>(47.88%)            | 6916496<br>(3.62%)      | 92554759<br>(48.49%)                 |
| LacZ                | RNA-seq  | induced     | R#2 | 52249590                      | 25660126<br>(49.11%)            | 2776669<br>(5.31%)      | 23812795<br>(45.58%)                 |
| LacZ                | Ribo-seq | non-induced | R#1 | 183013690                     | 124093781<br>(67.81%)           | 11347972<br>(6.20%)     | 47571937<br>(25.99%)                 |
| LacZ                | Ribo-seq | non-induced | R#2 | 53330842                      | 25579314<br>(47.96%)            | 4072967<br>(7.64%)      | 23678561<br>(44.40%)                 |
| LacZ                | Ribo-seq | induced     | R#1 | 199707963                     | 120352995<br>(60.26%)           | 7716217<br>(3.86%)      | 71638751<br>(35.87%)                 |
| LacZ                | Ribo-seq | induced     | R#2 | 41870343                      | 31443591<br>(75.10%)            | 1843808<br>(4.40%)      | 8582944<br>(20.50%)                  |

- a. Biological replicates are denoted “R#1” and “R#2” and “induced” relates to induction of PK-lacZ or LacZ expression with IPTG (1 mM).
- b. Reads aligning to more than one position in the genome, including tRNA and rRNA genes, were excluded from the data.
- c. Sequencing reads were mapped to the genome of *E. coli* K-12 MG1655 strain.
